# Supplementary material for: Factors relevant to work participation from the perspective of adults with developmental dyslexia: a systematic review of qualitative studies
Source: BMC Public Health. 2022 May 31;22:1083. doi: 10.1186/s12889-022-13436-x (PMC9158268; doi:10.1186/s12889-022-13436-x)
Supplement: Supplementary file 2 — Additional file 2. All extracted factors, classified according to the ICF-scheme [file 12889_2022_13436_MOESM2_ESM.xlsx]

## Sheet: Nieuwe Versie ICF Tabel
Additional File 2: All extracted factors, classified according to the ICF scheme
2nd level ICF	Factors				Studies from the 2014 review												Qualitative studies after 2014							Total
					Raskind, 1997 [33]	Shessel, 1999 [34]	Hellendoorn, 2000 [28]	Ferri, 2001 [29]	Lindstrom, 2002 [35]	McNulty, 2003 [23]	Price, 2003 [21]	Gerber, 2004 [25]	Ferri, 2005 [26]	Macdonald, 2009 [36]	Burns, 2011 [24]	Burns, 2013 [27]	Newlands, 2015 [37]	Skinner, 2015 [38]	Sang, 2016 [30]	Locke, 2016 [39]	Yeowell, 2018 [22]	Major, 2019a [31]	Major, 2019b [32]
FUNCTIONS & STRUCTURES
b1 MENTAL FUNCTIONS
b114 Orientation functions					x	x																		2
b125 Dispositions and intra-personal functions					x		x			x		x	x		x	x								7
	Adaptability (b1250)											x	x											2
	Perseverance/persistence (b1254)				x		x			x		x			x	x								6
b126 Temperament and personality functions					x		x			x			x	x	x		x	x	x		x	x		11
	Accuracy (b1262)						x																	1
	Being flustered (b1263)																x							1
	Confidence (b1266) (Uncertain/Insecure)				x		x			x			x					x	x		x	x		8
	Openness to experience														x									1
	Self-conscious / consciousness (b1262)													x			x							2
b140 Attention functions											x					x	x					x		4
	Dividing attention (b1402)															x								1
	Sustaining attention / concentration										x						x					x		3
b144 Memory functions					x	x						x			x		x	x		x		x		8
	Recalling specific patients																x							1
	Remembering information to pass on to colleagues																			x				1
	Remembering names				x															x				2
b152 Emotional functions					x	x	x	x		x	x	x	x	x	x	x	x		x	x	x		x	16
	Amount of passion												x											1
	Anxiety					x	x							x			x							4
	Aggressive feelings						x																	1
	Compassion					x																		1
	Confusion/anger					x		x		x	x													4
	Depression					x																		1
	Discouragement							x																1
	Emotional problems						x																	1
	Fear					x	x			x	x	x		x					x		x			8
	Feeling					x	x	x			x	x			x		x							7
	Frustration					x	x	x			x												x	5
	Humiliation																x							1
	Sense of strength				x	x				x		x	x		x	x								7
	Shame / embarrassment					x					x	x					x		x	x				6
	Worrying about bullying																x				x			2
b156 Perception						x				x														2
	Visuospatial perception (b1565)					x				x														2
b160 Thought functions					x	x				x		x				x								5
b164 Higher-level cognitive functions					x	x				x			x		x	x	x	x						8
	Executive functions															x								1
	Holistic / visual thinking				x										x	x								3
	Increased creativity / Thinking outside the box (b1643)					x				x														2
	Insight (b1644)																x	x						2
	Information processing																x	x						2
	Organization and planning (b1641)				x					x			x		x		x	x						6
b167 Mental functions of language						x																		1
	Word retrieval					x																		1
b180 Experience of self and time functions					x	x	x				x		x	x		x	x	x	x		x			11
	Bothered by being different				x																			1
	Capable of doing more																		x					1
	Depersonalize LD				x																			1
	Disability self-awareness				x		x				x		x			x					x			6
	Experience of self (b1800)					x																		1
	Negative self-perceptions / self-image					x	x				x						x							4
	Not seeing themselves as having a disability / being different						x				x			x				x						4
	Positive self-perceptions / self-image						x																	1
	Self-deprecation																	x						1
b4 FUNCTIONS OF THE CARDIOVASCULAR, HAEMATOLOGICAL, IMMUNOLOGICAL AND RESPIRATORY SYSTEMS
b455 Exercise tolerance functions							x										x					x		3
	Fatigue						x										x					x		3
ACTIVITIES (d1- d6) AND PARTICIPATION (d7- d9)
d1 LEARNING AND APPLYING KNOWLEDGE
d115 Listening					x	x																		2
d130-d159 Basic learning									x								x						x	3
	Learning																x							1
	Learning from role models																						x	1
	Learning through discussion																						x	1
	Learning through observation								x															1
d155 Acquiring skills					x									x	x	x			x	x		x		7
	Analytical skills				x																			1
	Developing coping strategies													x										1
	Developing different learning styles																					x		1
	Learning a new skill / task														x				x			x		3
	Practical skills														x	x								2
	Visual learning																			x				1
d160 Focusing attention																				x				1
	Over attention to detail																			x				1
d166 Reading					x	x	x			x	x			x	x	x	x	x		x			x	12
	Reading from a big screen																						x	1
	Reading names of drugs / local names																x							1
	Reading (CHI) numbers / data																x							1
	Reading other’s handwriting																x					x		2
	Reading out loud																x			x		x	x	4
	Reading speed				x	x					x					x	x	x		x				7
	Reading words / misreading words																			x				1
d170 Writing (spelling)					x		x	x		x	x	x	x	x	x	x	x	x	x	x		x	x	16
	Handwriting				x												x	x						3
	Structuring																			x		x		2
	Untidy writing if fast							x									x							2
	Writing / typing speed				x						x				x	x		x		x		x	x	8
d172 Calculating					x														x			x		3
d175 Solving problems					x	x						x			x			x						5
d2 GENERAL TASKS AND DEMANDS
d220 Undertaking multiple tasks					x	x									x	x		x	x	x				7
	Combining work, dyslexia and mothering																	x						1
	Correcting mistakes					x																		1
	Distinction between work and non-work																		x					1
	Gathering information				x															x				2
	Giving lectures / presentations / training sessions														x	x								2
d230 Carrying out daily routine					x	x	x						x				x	x		x				7
	Managing daily tasks (d2301)				x	x												x						3
	Managing one’s time (d2305)					x											x	x		x				4
	Sequencing tasks (d2306)																			x				1
d240 Handling stress and other responsibilities							x		x				x			x	x					x		6
	Handling responsibilities (d2400)								x				x									x		3
	Handling stress (d2401)						x									x	x							3
d3 COMMUNICATION
d310 Communicating with – receiving – spoken messages							x										x						x	3
d315 Communicating with – receiving nonverbal messages																x								1
	Receiving body gestures															x								1
d325 Communicating with – receiving – written messages					x	x									x				x	x				5
	Necessity for re-reading messages to understand meaning				x										x					x				3
	Reading and understanding forms and legal papers					x																		1
	Understanding the written message				x	x													x	x				4
d330 Speaking					x	x	x	x							x	x	x	x	x	x		x	x	12
	Improved communication																	x				x		2
	Pronunciation of the names of drugs																					x		1
	Speaking in public / presenting																x		x	x			x	4
	Verbal expression							x							x	x				x				4
d335 Producing nonverbal messages						x									x	x								3
	Using drawings/signs					x									x	x								3
d345 Writing messages					x		x				x			x			x		x	x		x	x	9
	Completing a literacy exercise													x										1
	Filling in (application) forms						x				x			x			x		x	x				6
	Handwriting death certificates																			x				1
	Keeping records / minutes																		x					1
	Note taking				x						x													2
	Putting your message on paper																						x	1
	Taking telephone messages																x							1
	Writing documentation																					x		1
	Writing down anamnestic data																			x				1
	Writing immediate discharge letters																x							1
	Writing prescriptions																x							1
	Writing referral letters																			x				1
	Writing / Using numbers																x			x				2
d355 Discussion							x				x	x			x	x								5
	Discussing (LD with employer / problems with colleagues; expressing feelings)						x				x	x			x									4
d360 Using communication devices and techniques					x		x							x		x								4
	Dialing a phone				x																			1
	Multitasking (on a computer)				x																			1
	Using computer software/skills				x		x							x		x								4
d7 INTERPERSONAL INTERACTIONS AND RELATIONSHIPS
d710 Basic interpersonal interactions															x	x								2
	Using social skills														x	x								2
d720 Complex interpersonal interactions							x																	1
	Forming relationships						x																	1
d740 Formal relationships					x	x		x					x			x			x			x		7
	Mobilizing network at work																		x					1
	Relationships at work / working relationships																		x					1
	Relationships with clients				x			x																2
	Relationships with colleagues					x										x			x			x		4
	Relationships with person in authority at work												x						x					2
d750 Informal social relationships					x								x		x	x			x					5
	Informal relationships with friends (d7500)				x								x											2
	Informal relationships with familiy (d760)												x											1
	Mobilizing social network														x				x					2
d8 MAJOR LIFE AREAS
d820 Schooling													x											1
d825 Vocational training															x			x				x	x	4
	Changing academic level																						x	1
	Returning to professional education														x			x						2
d830 Higher education																						x		1
d845 Acquiring, keeping and terminating a job						x			x	x	x	x		x				x	x		x	x		10
	Ability to maintain the career								x	x		x							x		x			5
	Achieving qualifications and employment status								x					x				x						3
	Applying for senior positions																		x			x		2
	Completing skills-specific tests during selection										x			x					x					3
	Demotion or dismissal					x			x	x				x					x					5
	Getting a job										x							x			x			3
	Participating in a job interview										x	x		x										3
	Occupation / career choice					x				x												x		3
	Overcoming recruitment difficulties																		x					1
	Seeking employment													x					x					2
	Skills for performing the job													x										1
	Terminating a job											x									x			2
	Working speed													x										1
d850 Remunerative employment					x		x		x	x		x		x		x	x	x	x	x	x			12
	Achievement/accomplishment				x		x			x						x								4
	Continuous changing of employment													x										1
	Employment roles													x										1
	Employment in unskilled/semiskilled occupations													x										1
	Enabled to excel				x																			1
	Having a job/being employed						x										x	x						3
	Job at the level of their training or higher						x																	1
	Job performance				x				x	x		x							x	x	x			7
	Paid employment											x												1
	Unemployed													x										1
ENVIRONMENTAL FACTORS
WORK-RELATED ENVIRONMENTAL FACTORS: TERMS OF EMPLOYMENT
					x				x		x	x		x				x	x			x		8
Adjustment of hours to enable people to have lunch																						x		1
Attendance									x															1
Change in job description/title												x												1
Formalizing recruitment practices																			x					1
Getting extra time												x										x		2
Incentives and bonuses												x												1
On-the-job training agreement									x															1
Promotion/Job advancement									x		x	x		x				x	x					6
School-to-work program									x															1
Vocational rehabilitation									x															1
Wage increase/decrease									x			x												2
Working at off hours late in the day or night					x																			1
Working full-time									x															1
e3 SUPPORT AND RELATIONSHIPS
including WORK-RELATED ENVIRONMENTAL FACTORS: SOCIAL RELATIONSHIPS AT WORK
e310 / e315 / e320 Immediate and extended family / friends							x	x	x		x	x	x			x		x	x					9
	Co-parenting on equal basis																	x						1
	Less career-oriented partner																	x						1
	Partner involvement																	x	x					2
	Support from outside work																	x	x					2
	Support from family/friends						x	x	x		x	x	x			x		x	x					9
e325 Acquaintances, peers, colleagues, neighbors and community members					x	x	x				x	x			x	x		x	x	x		x		11
	Administrative support																	x						1
	Being loners/isolated in the job					x													x					2
	Comments of colleagues																					x		1
	Control/check by others				x		x								x	x						x		5
	Help from colleagues / co-worker assistance / buddy / mentor						x				x	x			x	x		x	x			x		8
	Joint working															x								1
	Peer pressure				x																			1
	Performance feedback					x																		1
	Secretary dependent				x																			1
	Support in the workplace						x				x	x				x		x	x	x		x		8
e330 People in position of authority								x	x		x	x		x	x			x	x	x	x	x	x	12
	Employer assistance-support of management										x	x		x				x	x		x			6
	Role of employer-supervisor								x		x				x			x	x	x		x	x	8
	Support of rehabilitation staff								x															1
	Support of teacher							x																1
e4 ATTITUDES
including WORK-RELATED ENVIRONMENTAL FACTORS: SOCIAL RELATIONSHIPS AT WORK
e410-e420 Individual attitudes of (extended) family and friends																		x						1
e425 Individual attitudes of acquaintances, peers, colleagues, neighbors and community members					x		x	x		x	x	x	x	x	x	x		x	x	x	x	x	x	16
	Awareness/detection of the disability by others				x							x		x							x			4
	Being asked to rewrite text																					x		1
	Being laughed at / teased by colleagues / peers						x												x		x			3
	Being treated differently										x	x			x							x		4
	Interest in, acceptance / understanding of dyslexia						x					x										x	x	4
	Labeling people with LD as lazy, slow, dumb, stupid or help-seeking									x	x	x	x					x			x	x		7
	LD makes me important											x												1
	LD as a tool to address misconceptions about LD							x					x											2
	Reactions of co-workers				x		x	x				x		x	x	x		x		x	x			10
	Stigmatization / discrimination by colleagues													x										1
	Stigmatization by peers																				x			1
e430 Individual attitudes of people in position of authority					x		x	x	x		x	x		x	x			x			x	x	x	12
	Awareness / Acceptance of dyslexia by employer						x					x						x						3
	Detection/awareness of the disability				x							x		x										3
	Employer attitudes and knowledge										x							x						2
	Expectations of people with LD							x																1
	Humanistic qualities of line-manager / supervisor																				x			1
	Judgement of work on disability						x																	1
	Judgement of work without taking dyslexia into account														x			x						2
	Negative responses from employer				x				x		x	x		x	x			x			x	x		9
	Negative responses from teachers								x														x	2
	Stigmatization / discrimination by employer													x				x			x	x		4
e435 Individual attitudes of people in subordinate positions					x																			1
e460 Societal attitudes													x		x			x		x			x	5
	Way of viewing dyslexia by society generally												x		x			x		x			x	5
WORK-RELATED ENVIRONMENTAL FACTORS: TASK CONTENT
					x	x	x	x	x	x	x	x			x		x	x	x	x	x	x		15
Administrative tasks																				x		x		2
Benefits of current position									x															1
Challenging students to achieve their potential						x		x							x									3
Completing paperwork																			x	x		x		3
Demands involving calculating																	x		x					2
Demands involving reading or writing											x						x		x	x				4
Demands of the job						x																		1
Demands of a job interview											x													1
Demands wrt being accountable																			x					1
Demands wrt getting along with people																			x					1
Demands wrt working full-time									x															1
Finding a niche					x					x														2
Job level							x			x								x						3
Multitasking is required																	x			x				2
Practical / specialist job																					x			1
Productivity demands									x															1
Safety practices																			x					1
Workload, pressure, more stress										x		x					x	x	x	x		x		7
Work-related activities								x	x	x					x									4
Worktasks that require more responsibility											x	x								x				3
Worktasks that require prioritizing																	x			x				2
To work by myself											x	x												2
WORK-RELATED ENVIRONMENTAL FACTORS: WORKING CONDITIONS
e125 Products and technology for communication					x		x	x				x		x		x	x	x		x		x	x	11
	Assistive technology (like a dictaphone, internet, navigation software, watch, microcassette)				x			x				x		x		x	x	x		x		x	x	10
	Computer spelling and grammar programs				x		x									x	x							4
	Electronic health care records																					x		1
	Needing tuition before software can be used																					x	x	2
	Technology interferes with work/Experiment with technology				x																			1
e135 Products and technology for employment					x			x		x	x	x		x				x	x					8
	Accommodations on the job				x			x		x	x	x		x				x	x					8
e1650 Financial assets							x							x					x					3
	Budget for an assistant						x																	1
	Money													x					x					2
Other working conditions															x	x						x		3
	Quiet / personal work environment															x						x		2
	Time														x									1
OTHER WORK-RELATED ENVIRONMENTAL FACTORS
						x								x				x	x			x		5
Availability of staff																			x					1
Culture at work																			x					1
Disabling barriers														x										1
Experience with disabled workers																			x			x		2
Image of organisation						x																		1
Limited employment opportunities														x					x					2
Making the organization ‘dyslexia-friendly’																		x	x					2
Other (dyslexic) persons (with visible impairments) in organization																		x	x			x		3
Privatization of company																			x					1
Reorganization of work/teams																			x					1
Size of organization																			x					1
OTHER ENVIRONMENTAL FACTORS
e550 Legal services, systems and policies							x				x	x		x							x			5
	Disability Discrimination Act													x										1
	Knowledge of the ADA										x													1
	Legislation on adults with LD											x									x			2
	Official recognition of disability						x																	1
PERSONAL FACTORS
General personal data: Socio-demographic factors
										x				x				x	x					4
Gender																		x	x					2
Marital status /living status																			x					1
Socio-economic status														x										1
Standard / level of education										x														1
General 'mental' personal factors
					x	x	x	x	x	x	x	x	x	x	x	x	x	x	x	x	x	x	x	19
Aggravation											x													1
Ambition																		x					x	2
Creative						x		x							x									3
Demoralized														x										1
Desire to help others						x									x									2
Detail oriented					x																			1
Empathic															x			x						2
Humorous																x								1
Innovative						x									x									2
Learning/Coping strategies:					x	x	x	x		x	x	x	x	x	x	x	x	x	x	x	x	x	x	18
	Admitting that good is good enough																	x						1
	Asking caller to speak slowly					x																		1
	Asking for help					x	x				x	x					x		x			x		7
	Avoiding my weaknesses				x											x								2
	Avoiding reading						x																	1
	Avoiding situations																		x	x				2
	Avoiding to use difficult words																					x		1
	Avoiding to write on a board															x								1
	Bluffing												x											1
	Breaking up the text into bite-size pieces																			x				1
	Changing font size / colour																			x				1
	Checking and rechecking				x		x								x		x			x				5
	Choosing for part-time employment						x			x								x	x	x				5
	Denying need for help																x							1
	Developing visual memory																					x		1
	Disguising spelling						x															x		2
	Distancing himself from others									x			x											2
	Doing physical activities to recall ideas															x								1
	Doing things by myself							x																1
	Establishing themselves as intelligent													x										1
	Exposing own strengths and weaknesses											x									x		x	3
	Finding excuses																		x					1
	Giving colour coded feedback															x								1
	Having a pattern of overachieving									x														1
	Hiding the LD / Using camouflage					x		x			x		x	x		x								6
	Labeling LD as a kind of self-mockery												x											1
	Making careful mental and concrete preparations / planning														x	x	x					x		4
	Making lists or leave notes for myself / to-do lists in eye line																x	x				x		3
	Making people write things down what they have said				x																			1
	Making summaries / notes																					x		1
	Mind mapping														x	x	x			x				4
	Minimizing distraction																			x		x		2
	Overcompensation						x										x							2
	Overpreparation																x					x		2
	Preferring practically focused learning																						x	1
	Preferring verbal to written communication / presentation				x																	x	x	3
	Printing patient lists																x							1
	Prioritising and planning of tasks																x							1
	Putting off seeking further promotion																	x						1
	Putting excessive amount of energy in work						x										x							2
	Refraining																	x	x		x	x		4
	Repeating events																x							1
	Ringing / speaking face-to-face rather than using email / Improved communication						x									x		x				x		4
	Safeguarding against making mistakes																					x		1
	Safety-netting																x			x				2
	Self-imposed task restriction																		x	x				2
	Slowing down to enable revision and review														x		x							2
	Spelling aloud																x							1
	Taking extra time														x	x	x	x			x	x		6
	Taking work home											x					x	x	x	x				5
	Using authoritative language												x											1
	Using checklists																			x				1
	Using colour coding for priorities																			x				1
	Using compensatory skills				x								x							x				3
	Using dyslexia as an excuse																x					x		2
	Using humour / self-deprecation																x							1
	Using nonverbal signs															x								1
	Using other practical solutions						x																	1
	Using prompts / mnemonics / aide memoirs to recall topics						x									x						x	x	4
	Using proofreaders				x											x			x			x		4
	Using students as resource in classroom situations															x								1
	Using technology / software				x		x							x			x	x				x		6
	Using templates																			x		x		2
	Using tricks						x													x				2
	Using visualization techniques				x										x	x								3
	Working much harder				x		x								x	x		x						5
	Writing everything beforehand on the whiteboard																					x		1
	Writing things out in rough beforehand															x						x		2
Literacy level														x						x				2
Openness											x				x									2
Patience					x																			1
Personal problems							x																	1
Pride										x			x											2
Quality of life / well-being																	x							1
Satisfaction with life							x																	1
Sensitive to emotional experiences of others					x	x				x					x	x								5
Self-advocacy											x													1
Self-disclosure						x	x	x			x	x	x	x		x	x		x		x	x		12
Self-efficacy																x				x				2
Self-esteem					x			x		x			x		x	x								6
Self-management													x							x				2
Self-promotion											x									x				2
Self-sufficient					x																			1
Stress-experience/being stressed					x	x	x			x		x					x	x						7
Visual									x						x	x								3
Health-related personal factors
					x	x	x	x		x		x	x	x	x						x	x	x	12
Accepting the LD/dyslexia													x											1
Experiences with LD/dyslexia						x	x	x		x					x							x		6
Impact of the LD/dyslexia					x	x	x	x				x	x	x							x	x	x	10
Management of the LD/dyslexia														x										1
Life events
																			x					1
Divorce																			x					1
Work-related personal factors
					x	x	x	x	x	x		x	x		x	x	x	x				x	x	14
Belief all you need is more time																	x							1
Collaborative / co-operative															x									1
Commitment									x															1
Determination					x				x						x	x								4
Focus on career goal						x			x															2
Force of will													x											1
Independence					x			x		x								x						4
Job history					x		x					x	x		x									5
Job/Career satisfaction							x																	1
Negative perceptions of work-related skills																		x						1
Proactive															x							x		2
Successful					x			x	x	x		x	x		x									7
(Under) challenged										x													x	2
Vocational aspirations									x															1
Wanting to be treated equally																	x							1
	Total				94	66	84	40	39	49	59	67	47	65	77	78	84	87	90	74	37	90	39	-
